# Supplementary material for: International SF-36 reference values in patients with ischemic heart disease
Source: Springer Nature journal article supplement (doi:10.1007/s11136-016-1316-4), 2016-06-18
Supplement: MOESM1 [file 10272014]

## Supplementary Material

**1. Australia:** Physical Component Summary (PCS) and Mental Component Summary (MCS) measure grouped by diagnosis, gender and age (cells with bold scores indicate >1 standard deviation below the standardized mean of 50)

|                      | Mean   Standard deviation |             | Min   Max scores |             | 25 <sup>th</sup>   50 <sup>th</sup>   75 <sup>th</sup> percentile |                    |
|----------------------|---------------------------|-------------|------------------|-------------|-------------------------------------------------------------------|--------------------|
| Australia [N=220]    | PCS                       | MCS         | PCS              | MCS         | PCS                                                               | MCS                |
| <b>Diagnosis</b>     |                           |             |                  |             |                                                                   |                    |
| Angina [N=58]        | <b>35.9</b>   10.1        | 46.2   10.4 | 19.3   58.8      | 26.5   64.6 | 27.5   33.2   44.6                                                | 37.3   47.8   55.2 |
| MI [N=87]            | 41.1   11.9               | 48.5   10.9 | 16.2   63.8      | 22.6   66.2 | 29.8   40.9   52.8                                                | 40.0   47.6   58.9 |
| Heart failure [N=75] | <b>36.3</b>   10.4        | 49.2   11.0 | 20.2   57.9      | 23.6   65.7 | 27.4   34.5   44.7                                                | 39.8   51.6   57.8 |
| <b>Gender</b>        |                           |             |                  |             |                                                                   |                    |
| Female [N=44]        | <b>34.5</b>   10.4        | 44.8   10.7 | 19.9   57.0      | 26.5   65.7 | 26.2   31.1   43.6                                                | 35.4   44.5   51.4 |
| Male [N=176]         | <b>39.0</b>   11.2        | 49.0   10.7 | 16.2   63.8      | 22.6   66.2 | 29.4   37.2   49.5                                                | 40.0   50.4   58.3 |
| <b>Age</b>           |                           |             |                  |             |                                                                   |                    |
| < 51 years [N=22]    | 44.3   11.2               | 47.3   11.6 | 16.2   58.8      | 26.5   63.0 | 38.6   48.6   52.3                                                | 39.4   46.8   59.2 |
| 51-60 years [N=47]   | <b>39.6</b>   11.6        | 46.4   10.9 | 21.3   63.8      | 26.5   64.2 | 29.6   38.1   51.8                                                | 37.1   47.9   56.6 |
| 61-70 years [N=68]   | <b>37.5</b>   11.1        | 48.6   11.0 | 22.1   59.0      | 22.6   65.7 | 27.6   34.8   48.1                                                | 40.3   49.8   57.5 |
| > 70 years [N=83]    | <b>36.0</b>   10.4        | 48.9   10.5 | 19.3   58.9      | 23.6   66.2 | 27.7   34.2   43.1                                                | 39.7   50.2   57.9 |

International SF-36 reference values in patients with ischemic heart disease; *Quality of Life Research*; **A., Huber<sup>a,b</sup>**, N., Oldridge, & S., Höfer. (2016).

<sup>a</sup> Department of Medical Psychology, Medical University of Innsbruck, Speckbacherstraße 23/III, 6020 Innsbruck, Austria

<sup>b</sup> Institute of Psychology, Leopold Franzens University Innsbruck, Innrain 52f, Bruno-Sander-Haus, 6020 Innsbruck, Austria

E-Mail: alexandra.huber@i-med.ac.at

**2. Austria, Germany & Switzerland:** Physical Component Summary (PCS) and Mental Component Summary (MCS) measure grouped by diagnosis, gender and age (cells with bold scores indicate >1 standard deviation below the standardized mean of 50)

|                               | Mean   Standard deviation |             | Min   Max scores |             | 25 <sup>th</sup>   50 <sup>th</sup>   75 <sup>th</sup> percentile |                    |
|-------------------------------|---------------------------|-------------|------------------|-------------|-------------------------------------------------------------------|--------------------|
|                               | PCS                       | MCS         | PCS              | MCS         | PCS                                                               | MCS                |
| <b>AUT / GER / CH [N=329]</b> |                           |             |                  |             |                                                                   |                    |
| <b>Diagnosis</b>              |                           |             |                  |             |                                                                   |                    |
| Angina [N=105]                | 41.3   9.0                | 46.3   10.7 | 20.3   60.4      | 21.7   64.9 | 34.9   40.9   49.0                                                | 38.7   47.9   55.3 |
| MI [N=131]                    | 46.4   8.0                | 47.4   10.7 | 26.5   62.1      | 21.8   65.0 | 41.9   47.3   53.0                                                | 40.9   48.8   57.2 |
| Heart failure [N=93]          | <b>39.5</b>   9.1         | 46.0   11.0 | 17.9   56.7      | 21.0   65.8 | 33.0   39.5   46.6                                                | 36.9   47.3   55.4 |
| <b>Gender</b>                 |                           |             |                  |             |                                                                   |                    |
| Female [N=45]                 | 41.6   9.6                | 43.6   10.2 | 22.2   60.4      | 22.6   65.0 | 33.1   41.7   48.6                                                | 36.5   42.4   51.8 |
| Male [N=284]                  | 43.0   9.1                | 47.1   10.8 | 17.9   62.1      | 21.0   65.8 | 36.1   48.6   56.4                                                | 39.9   48.6   56.4 |
| <b>Age</b>                    |                           |             |                  |             |                                                                   |                    |
| < 51 years [N=89]             | 44.4   9.3                | 44.0   10.8 | 21.7   62.1      | 21.8   62.2 | 36.8   44.3   51.8                                                | 34.9   45.0   52.3 |
| 51-60 years [N=126]           | 41.6   9.3                | 45.8   11.2 | 17.9   61.7      | 21.0   65.8 | 35.1   41.2   48.5                                                | 37.6   46.3   55.8 |
| 61-70 years [N=81]            | 44.1   8.5                | 49.9   9.2  | 21.4   58.7      | 27.6   63.1 | 37.1   45.2   50.7                                                | 43.0   52.2   57.5 |
| > 70 years [N=33]             | 40.2   8.8                | 49.2   10.5 | 25.6   55.4      | 29.8   64.0 | 32.5   40.0   47.3                                                | 40.0   50.8   58.2 |

**3. Belgium:** Physical Component Summary (PCS) and Mental Component Summary (MCS) measure grouped by diagnosis, gender and age (cells with bold scores indicate >1 standard deviation below the standardized mean of 50)

|                        | Mean   Standard deviation |             | Min   Max scores |             | 25 <sup>th</sup>   50 <sup>th</sup>   75 <sup>th</sup> percentile |                    |
|------------------------|---------------------------|-------------|------------------|-------------|-------------------------------------------------------------------|--------------------|
| <b>Belgium [N=304]</b> | <b>PCS</b>                | <b>MCS</b>  | <b>PCS</b>       | <b>MCS</b>  | <b>PCS</b>                                                        | <b>MCS</b>         |
| <b>Diagnosis</b>       |                           |             |                  |             |                                                                   |                    |
| Angina [N=91]          | 42.9   10.0               | 48.7   11.0 | 20.1   63.1      | 17.2   65.6 | 35.4   43.9   51.9                                                | 40.3   51.9   57.6 |
| MI [N=126]             | 46.1   8.2                | 50.7   9.6  | 21.4   60.8      | 16.6   64.6 | 40.5   47.6   52.3                                                | 44.7   52.9   58.3 |
| Heart failure [N=87]   | <b>37.8</b>   9.5         | 50.5   9.4  | 19.3   57.2      | 29.4   68.1 | 31.5   38.8   46.0                                                | 43.9   50.9   58.3 |
| <b>Gender</b>          |                           |             |                  |             |                                                                   |                    |
| Female [N=56]          | 41.5   10.7               | 49.0   9.9  | 20.1   63.1      | 17.2   64.1 | 32.0   42.8   49.8                                                | 42.2   50.0   57.7 |
| Male [N=248]           | 43.0   9.5                | 50.3   10.0 | 19.3   62.6      | 16.6   68.0 | 35.4   43.5   51.0                                                | 43.8   52.4   58.3 |
| <b>Age</b>             |                           |             |                  |             |                                                                   |                    |
| < 51 years [N=42]      | 43.7   10.3               | 47.0   10.6 | 20.1   60.8      | 16.6   63.3 | 34.9   43.1   53.3                                                | 39.4   47.8   55.7 |
| 51-60 years [N=92]     | 44.5   9.1                | 49.2   10.9 | 20.1   63.1      | 17.2   66.4 | 39.6   44.2   50.2                                                | 41.9   52.0   58.0 |
| 61-70 years [N=93]     | 44.6   8.5                | 50.9   9.2  | 19.3   57.6      | 27.2   64.6 | 38.7   45.9   51.7                                                | 45.0   53.5   58.5 |
| > 70 years [N=77]      | <b>37.9</b>   10.1        | 51.6   8.9  | 19.9   58.2      | 29.4   68.1 | 31.1   35.7   45.6                                                | 45.4   53.7   59.0 |

**4. Canada:** Physical Component Summary (PCS) and Mental Component Summary (MCS) measure grouped by diagnosis, gender and age (cells with bold scores indicate >1 standard deviation below the standardized mean of 50)

|                      | Mean   Standard deviation |             | Min   Max scores |             | 25 <sup>th</sup>   50 <sup>th</sup>   75 <sup>th</sup> percentile |                    |
|----------------------|---------------------------|-------------|------------------|-------------|-------------------------------------------------------------------|--------------------|
| Canada [N=328]       | PCS                       | MCS         | PCS              | MCS         | PCS                                                               | MCS                |
| <b>Diagnosis</b>     |                           |             |                  |             |                                                                   |                    |
| Angina [N=95]        | 43.1   10.2               | 51.5   9.7  | 13.5   61.5      | 51.5   9.7  | 37.0   45.0   50.1                                                | 47.0   53.4   58.8 |
| MI [N=139]           | 46.3   9.0                | 50.1   9.1  | 15.6   61.6      | 21.6   62.5 | 41.1   48.1   53.0                                                | 46.3   53.1   57.9 |
| Heart failure [N=94] | <b>36.1</b>   10.0        | 51.1   9.6  | 13.0   55.5      | 28.1   67.2 | 29.4   36.5   43.3                                                | 43.0   53.7   59.2 |
| <b>Gender</b>        |                           |             |                  |             |                                                                   |                    |
| Female [N=67]        | 40.4   10.5               | 50.5   9.7  | 15.6   58.9      | 27.0   64.6 | 32.6   41.8   48.5                                                | 43.3   52.2   57.9 |
| Male [N=261]         | 43.0   10.5               | 51.1   9.4  | 13.0   61.6      | 21.6   67.2 | 36.7   44.8   50.9                                                | 46.0   53.6   58.6 |
| <b>Age</b>           |                           |             |                  |             |                                                                   |                    |
| < 51 years [N=48]    | 45.1   9.9                | 48.9   9.7  | 15.6   61.6      | 27.2   61.8 | 41.1   46.7   51.2                                                | 44.6   50.6   56.6 |
| 51-60 years [N=89]   | 44.7   9.6                | 49.5   9.3  | 16.9   61.2      | 27.0   64.7 | 38.1   45.6   53.5                                                | 41.9   50.9   56.9 |
| 61-70 years [N=103]  | 41.0   11.3               | 51.3   10.1 | 13.5   61.5      | 21.6   66.8 | 33.6   43.2   50.9                                                | 44.3   54.7   59.3 |
| > 70 years [N=88]    | 40.3   10.3               | 53.2   8.2  | 13.0   58.9      | 28.9   67.2 | 34.2   41.9   48.4                                                | 47.8   55.5   59.2 |

**5. Cuba:** Physical Component Summary (PCS) and Mental Component Summary (MCS) measure grouped by diagnosis, gender and age (cells with bold scores indicate >1 standard deviation below the standardized mean of 50)

|                      | Mean   Standard deviation |             | Min   Max scores |             | 25 <sup>th</sup>   50 <sup>th</sup>   75 <sup>th</sup> percentile |                    |
|----------------------|---------------------------|-------------|------------------|-------------|-------------------------------------------------------------------|--------------------|
| Cuba [N=159]         | PCS                       | MCS         | PCS              | MCS         | PCS                                                               | MCS                |
| <b>Diagnosis</b>     |                           |             |                  |             |                                                                   |                    |
| Angina [N=57]        | <b>39.4</b>   9.1         | 48.4   9.9  | 19.7   55.8      | 22.1   65.1 | 32.7   39.5   46.6                                                | 43.2   49.1   55.3 |
| MI [N=74]            | 40.0   7.2                | 50.4   12.1 | 19.4   54.6      | 18.4   71.5 | 34.2   39.3   45.9                                                | 44.9   51.4   59.6 |
| Heart failure [N=28] | <b>32.2</b>   8.5         | 47.9   11.4 | 19.1   51.1      | 24.1   66.0 | 25.5   32.2   37.6                                                | 40.0   49.7   56.5 |
| <b>Gender</b>        |                           |             |                  |             |                                                                   |                    |
| Female [N=32]        | <b>35.9</b>   8.6         | 42.8   11.3 | 19.1   54.6      | 22.1   64.6 | 29.5   35.1   42.3                                                | 31.6   44.3   50.6 |
| Male [N=127]         | <b>39.1</b>   8.5         | 50.9   10.6 | 19.4   55.8      | 18.4   71.5 | 33.6   39.2   46.0                                                | 45.0   50.9   58.5 |
| <b>Age</b>           |                           |             |                  |             |                                                                   |                    |
| < 51 years [N=33]    | 41.9   7.5                | 47.8   11.9 | 26.8   54.6      | 19.1   66.0 | 37.5   42.0   48.0                                                | 44.7   49.2   55.8 |
| 51-60 years [N=42]   | <b>39.0</b>   10.0        | 50.1   12.5 | 19.4   55.8      | 19.3   71.5 | 32.8   39.8   46.5                                                | 42.3   52.2   60.0 |
| 61-70 years [N=61]   | <b>36.1</b>   7.7         | 51.3   9.0  | 19.1   53.7      | 28.3   66.2 | 31.1   35.7   42.1                                                | 45.5   50.2   59.5 |
| > 70 years [N=23]    | <b>38.5</b>   8.1         | 44.4   11.6 | 19.7   51.5      | 18.4   61.6 | 33.5   37.7   44.1                                                | 34.1   46.3   54.7 |

**6. Denmark:** Physical Component Summary (PCS) and Mental Component Summary (MCS) measure grouped by diagnosis, gender and age (cells with bold scores indicate >1 standard deviation below the standardized mean of 50)

|                      | Mean   Standard deviation |             | Min   Max scores |             | 25 <sup>th</sup>   50 <sup>th</sup>   75 <sup>th</sup> percentile |                    |
|----------------------|---------------------------|-------------|------------------|-------------|-------------------------------------------------------------------|--------------------|
| Denmark [N=277]      | PCS                       | MCS         | PCS              | MCS         | PCS                                                               | MCS                |
| <b>Diagnosis</b>     |                           |             |                  |             |                                                                   |                    |
| Angina [N=111]       | 41.2   8.7                | 49.6   9.8  | 21.5   56.3      | 22.6   73.1 | 34.9   41.0   48.8                                                | 43.2   51.6   57.5 |
| MI [N=90]            | 45.8   10.1               | 50.9   8.6  | 20.2   58.1      | 30.3   65.9 | 44.2   52.9   58.1                                                | 44.2   52.9   58.1 |
| Heart failure [N=76] | <b>39.5</b>   9.4         | 50.5   11.0 | 22.3   57.5      | 21.6   67.0 | 31.7   37.2   48.2                                                | 43.9   50.6   60.4 |
| <b>Gender</b>        |                           |             |                  |             |                                                                   |                    |
| Female [N=67]        | <b>38.8</b>   9.9         | 47.1   11.2 | 21.0   57.4      | 21.6   66.1 | 30.3   38.9   45.8                                                | 39.8   45.9   56.8 |
| Male [N=210]         | 43.3   9.4                | 51.3   9.1  | 20.2   58.1      | 27.4   73.1 | 35.5   45.0   51.0                                                | 45.2   53.4   58.0 |
| <b>Age</b>           |                           |             |                  |             |                                                                   |                    |
| < 51 years [N=36]    | 45.0   10.4               | 47.1   10.3 | 24.8   58.1      | 22.6   65.6 | 36.0   49.0   54.4                                                | 39.2   45.2   56.6 |
| 51-60 years [N=66]   | 42.9   8.5                | 48.8   9.9  | 24.6   57.2      | 21.6   65.3 | 35.6   44.1   50.6                                                | 43.3   50.5   57.0 |
| 61-70 years [N=89]   | 43.9   9.8                | 52.3   9.3  | 21.7   58.0      | 28.9   64.6 | 36.9   46.4   52.0                                                | 45.4   54.9   60.3 |
| > 70 years [N=86]    | <b>38.8</b>   9.3         | 50.8   9.7  | 20.2   56.6      | 27.4   73.1 | 31.1   38.3   45.9                                                | 43.7   51.0   57.4 |

**7. France:** Physical Component Summary (PCS) and Mental Component Summary (MCS) measure grouped by diagnosis, gender and age (cells with bold scores indicate >1 standard deviation below the standardized mean of 50)

|                       | Mean   Standard deviation |             | Min   Max scores |             | 25 <sup>th</sup>   50 <sup>th</sup>   75 <sup>th</sup> percentile |                    |
|-----------------------|---------------------------|-------------|------------------|-------------|-------------------------------------------------------------------|--------------------|
| France [N=345]        | PCS                       | MCS         | PCS              | MCS         | PCS                                                               | MCS                |
| <b>Diagnosis</b>      |                           |             |                  |             |                                                                   |                    |
| Angina [N=97]         | 40.1   7.3                | 40.4   10.4 | 25.6   56.7      | 20.3   66.0 | 34.3   40.0   44.6                                                | 33.2   40.4   47.6 |
| MI [N=148]            | 43.4   7.8                | 40.8   10.6 | 24.5   59.6      | 14.0   66.5 | 38.0   43.3   49.8                                                | 31.8   40.8   48.1 |
| Heart failure [N=100] | <b>38.9</b>   8.0         | 42.8   10.7 | 22.2   54.4      | 23.0   67.2 | 33.0   38.8   45.1                                                | 33.5   42.1   51.8 |
| <b>Gender</b>         |                           |             |                  |             |                                                                   |                    |
| Female [N=62]         | 40.4   8.8                | 41.2   11.6 | 22.2   59.6      | 20.3   66.5 | 33.4   39.2   47.3                                                | 32.6   40.2   50.7 |
| Male [N=283]          | 41.3   7.8                | 41.3   10.3 | 23.5   57.8      | 14.0   67.2 | 35.8   41.5   47.3                                                | 33.1   41.5   49.5 |
| <b>Age</b>            |                           |             |                  |             |                                                                   |                    |
| < 51 years [N=80]     | 42.6   7.6                | 40.2   10.7 | 26.6   55.3      | 19.9   62.7 | 36.5   42.0   49.3                                                | 30.7   39.6   47.9 |
| 51-60 years [N=112]   | 41.1   8.3                | 40.6   10.9 | 22.2   59.6      | 14.0   62.7 | 35.5   41.9   46.4                                                | 32.6   39.5   48.4 |
| 61-70 years [N=99]    | 41.0   8.4                | 43.1   9.7  | 23.5   55.1      | 20.3   65.7 | 35.0   40.2   48.6                                                | 35.0   43.5   51.3 |
| > 70 years [N=54]     | <b>39.5</b>   6.9         | 40.8   11.0 | 27.4   56.7      | 22.5   67.2 | 34.9   39.4   43.8                                                | 33.0   40.2   46.8 |

**8. Hungary:** Physical Component Summary (PCS) and Mental Component Summary (MCS) measure grouped by diagnosis, gender and age (cells with bold scores indicate >1 standard deviation below the standardized mean of 50)

|                      | Mean   Standard deviation |             | Min   Max scores |             | 25 <sup>th</sup>   50 <sup>th</sup>   75 <sup>th</sup> percentile |                    |
|----------------------|---------------------------|-------------|------------------|-------------|-------------------------------------------------------------------|--------------------|
| Hungary [N=263]      | PCS                       | MCS         | PCS              | MCS         | PCS                                                               | MCS                |
| <b>Diagnosis</b>     |                           |             |                  |             |                                                                   |                    |
| Angina [N=89]        | <b>33.4</b>   7.7         | 43.2   11.3 | 14.7   50.0      | 20.0   63.6 | 28.2   33.0   39.1                                                | 34.4   43.3   53.0 |
| MI [N=92]            | <b>39.6</b>   8.6         | 46.2   12.4 | 18.1   57.7      | 19.7   66.9 | 31.4   40.3   45.3                                                | 37.0   47.8   57.6 |
| Heart failure [N=82] | <b>33.2</b>   7.9         | 46.9   11.6 | 14.0   50.2      | 23.8   70.8 | 26.9   32.9   39.7                                                | 38.2   48.2   55.5 |
| <b>Gender</b>        |                           |             |                  |             |                                                                   |                    |
| Female [N=120]       | <b>32.5</b>   7.9         | 43.2   11.8 | 14.7   54.9      | 20.0   64.8 | 26.8   30.5   38.4                                                | 33.6   42.2   52.8 |
| Male [N=143]         | <b>38.0</b>   8.4         | 47.2   11.6 | 14.0   57.7      | 19.7   70.8 | 32.1   38.2   44.6                                                | 38.3   48.0   57.4 |
| <b>Age</b>           |                           |             |                  |             |                                                                   |                    |
| < 51 years [N=26]    | <b>38.9</b>   9.9         | 47.9   12.4 | 18.1   55.4      | 22.1   66.9 | 31.9   38.2   47.5                                                | 41.2   50.1   56.4 |
| 51-60 years [N=98]   | <b>37.1</b>   9.0         | 45.2   12.2 | 14.0   57.7      | 19.7   70.8 | 30.4   37.2   44.6                                                | 34.7   46.3   56.4 |
| 61-70 years [N=86]   | <b>35.2</b>   7.0         | 44.6   11.9 | 20.9   52.7      | 21.0   64.8 | 30.4   33.7   40.1                                                | 35.7   43.7   55.4 |
| > 70 years [N=53]    | <b>31.4</b>   8.0         | 45.8   10.9 | 19.8   55.9      | 24.1   63.6 | 25.6   29.5   38.5                                                | 36.5   47.9   55.0 |



**9. Ireland & UK:** Physical Component Summary (PCS) and Mental Component Summary (MCS) measure grouped by diagnosis, gender and age (cells with bold scores indicate >1 standard deviation below the standardized mean of 50)

|                      | Mean   Standard deviation |             | Min   Max scores |             | 25 <sup>th</sup>   50 <sup>th</sup>   75 <sup>th</sup> percentile |                    |
|----------------------|---------------------------|-------------|------------------|-------------|-------------------------------------------------------------------|--------------------|
| Ireland & UK [N=266] | PCS                       | MCS         | PCS              | MCS         | PCS                                                               | MCS                |
| <b>Diagnosis</b>     |                           |             |                  |             |                                                                   |                    |
| Angina [N=91]        | <b>37.8</b>   10.3        | 49.6   10.8 | 18.8   58.4      | 19.1   66.0 | 29.9   36.8   44.9                                                | 43.7   52.2   57.0 |
| MI [N=102]           | 42.3   10.5               | 49.8   9.2  | 14.1   62.4      | 17.9   62.1 | 34.9   45.6   49.7                                                | 44.5   50.8   57.7 |
| Heart failure [N=73] | <b>33.7</b>   10.7        | 53.1   9.2  | 14.8   55.8      | 30.8   66.9 | 25.4   32.1   41.8                                                | 46.9   53.9   61.2 |
| <b>Gender</b>        |                           |             |                  |             |                                                                   |                    |
| Female [N=72]        | <b>37.9</b>   10.0        | 50.6   10.5 | 15.7   54.8      | 24.1   66.9 | 30.3   37.2   46.2                                                | 41.5   52.2   59.3 |
| Male [N=194]         | <b>38.6</b>   11.4        | 50.6   9.6  | 14.1   62.4      | 17.9   66.8 | 28.9   38.9   47.5                                                | 45.1   52.1   57.9 |
| <b>Age</b>           |                           |             |                  |             |                                                                   |                    |
| < 51 years [N=36]    | 40.4   10.9               | 46.1   11.7 | 20.4   58.4      | 17.9   61.6 | 32.0   39.2   49.6                                                | 37.8   48.7   56.2 |
| 51-60 years [N=71]   | <b>38.4</b>   10.6        | 49.3   9.3  | 20.0   57.8      | 23.6   65.8 | 29.9   40.9   48.7                                                | 43.7   50.3   56.7 |
| 61-70 years [N=92]   | <b>38.6</b>   11.5        | 50.8   10.0 | 14.0   62.4      | 19.1   65.5 | 28.9   39.3   48.7                                                | 45.2   52.6   59.1 |
| > 70 years [N=67]    | <b>36.5</b>   10.9        | 54.1   7.9  | 15.7   56.2      | 34.0   66.9 | 28.2   36.8   46.2                                                | 48.8   55.1   60.1 |

**10. Italy:** Physical Component Summary (PCS) and Mental Component Summary (MCS) measure grouped by diagnosis, gender and age (cells with bold scores indicate >1 standard deviation below the standardized mean of 50)

|                      | Mean   Standard deviation |             | Min   Max scores |             | 25 <sup>th</sup>   50 <sup>th</sup>   75 <sup>th</sup> percentile |                    |
|----------------------|---------------------------|-------------|------------------|-------------|-------------------------------------------------------------------|--------------------|
| Italy [N=258]        | PCS                       | MCS         | PCS              | MCS         | PCS                                                               | MCS                |
| <b>Diagnosis</b>     |                           |             |                  |             |                                                                   |                    |
| Angina [N=85]        | <b>39.7</b>   9.4         | 48.3   9.6  | 19.2   59.6      | 24.2   66.3 | 33.4   40.1   46.9                                                | 42.3   49.5   54.9 |
| MI [N=96]            | 46.1   8.1                | 46.7   9.1  | 24.7   59.6      | 25.6   61.7 | 41.3   47.6   52.2                                                | 40.3   47.3   54.1 |
| Heart failure [N=77] | <b>39.4</b>   8.5         | 45.5   10.8 | 19.8   57.0      | 24.4   68.9 | 32.9   39.8   45.9                                                | 37.1   45.3   54.9 |
| <b>Gender</b>        |                           |             |                  |             |                                                                   |                    |
| Female [N=57]        | <b>38.6</b>   10.6        | 44.1   10.0 | 19.6   54.2      | 24.2   63.1 | 28.9   40.9   48.0                                                | 35.8   45.3   51.6 |
| Male [N=201]         | 42.9   8.5                | 47.6   9.6  | 19.2   59.6      | 24.4   68.9 | 36.3   43.0   50.2                                                | 40.5   48.8   55.2 |
| <b>Age</b>           |                           |             |                  |             |                                                                   |                    |
| < 51 years [N=28]    | 47.6   7.1                | 48.4   10.9 | 30.1   59.1      | 26.4   68.9 | 42.2   49.4   53.6                                                | 38.7   51.2   56.3 |
| 51-60 years [N=63]   | 41.4   8.7                | 47.3   9.9  | 19.8   59.6      | 24.2   65.5 | 35.9   41.2   49.2                                                | 40.3   47.2   55.5 |
| 61-70 years [N=93]   | 41.6   9.2                | 46.7   9.2  | 19.2   59.6      | 25.6   64.5 | 34.4   42.6   49.2                                                | 39.2   48.4   53.4 |
| > 70 years [N=74]    | 40.9   9.6                | 46.1   10.1 | 19.6   56.3      | 24.4   66.3 | 33.6   42.8   48.8                                                | 40.1   45.6   54.2 |

**11. Netherlands:** Physical Component Summary (PCS) and Mental Component Summary (MCS) measure grouped by diagnosis, gender and age (cells with bold scores indicate >1 standard deviation below the standardized mean of 50)

|                      | Mean   Standard deviation |             | Min   Max scores |             | 25 <sup>th</sup>   50 <sup>th</sup>   75 <sup>th</sup> percentile |                    |
|----------------------|---------------------------|-------------|------------------|-------------|-------------------------------------------------------------------|--------------------|
| Netherlands [N=331]  | PCS                       | MCS         | PCS              | MCS         | PCS                                                               | MCS                |
| <b>Diagnosis</b>     |                           |             |                  |             |                                                                   |                    |
| Angina [N=93]        | <b>37.4</b>   9.5         | 48.3   10.1 | 11.9   66.4      | 22.6   67.8 | 29.9   37.3   44.7                                                | 43.0   49.8   56.0 |
| MI [N=145]           | 48.5   7.4                | 49.4   10.6 | 29.1   62.1      | 22.0   70.5 | 44.8   49.6   54.2                                                | 41.4   51.9   57.9 |
| Heart failure [N=93] | <b>39.4</b>   10.1        | 50.7   9.7  | 17.2   58.9      | 26.3   67.2 | 31.9   40.1   46.0                                                | 45.9   52.4   58.2 |
| <b>Gender</b>        |                           |             |                  |             |                                                                   |                    |
| Female [N=68]        | 42.0   10.0               | 48.1   10.0 | 20.0   62.1      | 23.8   63.7 | 32.9   43.7   48.6                                                | 41.6   48.8   57.2 |
| Male [N=263]         | 43.0   10.2               | 49.8   10.3 | 11.9   66.4      | 22.0   70.5 | 34.9   44.1   51.8                                                | 43.6   52.0   57.7 |
| <b>Age</b>           |                           |             |                  |             |                                                                   |                    |
| < 51 years [N=54]    | 44.5   9.7                | 44.8   11.9 | 19.9   62.1      | 22.0   65.3 | 38.2   45.5   52.2                                                | 34.7   46.3   55.8 |
| 51-60 years [N=110]  | 44.1   10.2               | 49.6   9.8  | 11.9   66.4      | 22.6   70.5 | 37.2   45.7   52.7                                                | 43.2   52.1   57.4 |
| 61-70 years [N=85]   | 42.5   9.6                | 50.5   9.9  | 18.9   61.5      | 24.7   67.8 | 33.3   44.6   50.7                                                | 45.9   51.7   57.6 |
| > 70 years [N=82]    | 40.4   10.6               | 51.3   9.2  | 18.3   57.4      | 28.4   63.5 | 31.7   41.2   49.3                                                | 45.4   52.8   59.2 |

**12. Norway:** Physical Component Summary (PCS) and Mental Component Summary (MCS) measure grouped by diagnosis, gender and age (cells with bold scores indicate >1 standard deviation below the standardized mean of 50)

|                      | Mean   Standard deviation |             | Min   Max scores |             | 25 <sup>th</sup>   50 <sup>th</sup>   75 <sup>th</sup> percentile |                    |
|----------------------|---------------------------|-------------|------------------|-------------|-------------------------------------------------------------------|--------------------|
| Norway [N=294]       | PCS                       | MCS         | PCS              | MCS         | PCS                                                               | MCS                |
| <b>Diagnosis</b>     |                           |             |                  |             |                                                                   |                    |
| Angina [N=91]        | <b>37.0</b>   9.2         | 48.2   10.5 | 16.5   57.3      | 23.8   67.3 | 30.1   36.5   42.7                                                | 39.8   48.5   58.2 |
| MI [N=115]           | 42.3   9.2                | 50.4   8.8  | 15.0   59.1      | 29.2   67.1 | 36.1   43.2   49.2                                                | 43.5   52.2   56.8 |
| Heart failure [N=88] | <b>34.8</b>   10.9        | 50.0   10.5 | 10.9   59.3      | 24.0   70.5 | 26.5   33.7   42.5                                                | 42.6   51.6   57.8 |
| <b>Gender</b>        |                           |             |                  |             |                                                                   |                    |
| Female [N=48]        | <b>36.2</b>   10.5        | 48.3   12.0 | 13.7   58.9      | 23.8   70.1 | 28.5   36.9   43.2                                                | 37.1   48.7   58.5 |
| Male [N=246]         | <b>38.9</b>   10.1        | 49.8   9.4  | 10.9   59.3      | 24.0   70.5 | 31.4   39.4   46.4                                                | 43.1   50.8   57.6 |
| <b>Age</b>           |                           |             |                  |             |                                                                   |                    |
| < 51 years [N=28]    | 41.9   10.3               | 47.5   9.9  | 21.1   58.2      | 23.8   63.1 | 36.6   41.4   51.3                                                | 39.4   49.5   56.3 |
| 51-60 years [N=87]   | <b>39.5</b>   10.2        | 49.8   9.9  | 17.9   59.3      | 26.6   70.5 | 30.8   40.7   46.6                                                | 43.2   50.2   57.1 |
| 61-70 years [N=109]  | <b>38.2</b>   10.9        | 50.5   9.7  | 13.7   57.4      | 26.5   69.0 | 30.3   37.9   47.2                                                | 43.7   51.8   58.9 |
| > 70 years [N=70]    | <b>36.1</b>   8.7         | 48.8   10.1 | 10.9   52.0      | 24.0   67.1 | 29.1   36.1   43.1                                                | 39.2   51.4   57.5 |

**13. Poland:** Physical Component Summary (PCS) and Mental Component Summary (MCS) measure grouped by diagnosis, gender and age (cells with bold scores indicate >1 standard deviation below the standardized mean of 50)

|                      | Mean   Standard deviation |             | Min   Max scores |             | 25 <sup>th</sup>   50 <sup>th</sup>   75 <sup>th</sup> percentile |                    |
|----------------------|---------------------------|-------------|------------------|-------------|-------------------------------------------------------------------|--------------------|
| Poland [N=314]       | PCS                       | MCS         | PCS              | MCS         | PCS                                                               | MCS                |
| <b>Diagnosis</b>     |                           |             |                  |             |                                                                   |                    |
| Angina [N=109]       | <b>35.6</b>   8.4         | 45.3   10.8 | 18.8   56.2      | 21.1   64.5 | 29.8   33.7   41.7                                                | 36.8   45.0   53.7 |
| MI [N=112]           | 42.8   9.8                | 46.8   9.0  | 20.5   60.5      | 24.0   65.6 | 35.3   42.9   51.5                                                | 40.9   48.0   53.9 |
| Heart failure [N=93] | <b>35.5</b>   10.2        | 46.9   9.7  | 19.0   60.3      | 22.6   64.0 | 27.6   32.6   43.8                                                | 40.8   48.1   54.0 |
| <b>Gender</b>        |                           |             |                  |             |                                                                   |                    |
| Female [N=82]        | <b>36.2</b>   9.3         | 45.5   10.0 | 20.5   60.0      | 21.1   63.5 | 29.3   33.2   43.1                                                | 39.9   46.5   54.0 |
| Male [N=232]         | <b>38.8</b>   10.3        | 46.6   9.8  | 18.8   60.5      | 22.6   65.6 | 30.1   38.3   46.9                                                | 39.3   47.9   54.0 |
| <b>Age</b>           |                           |             |                  |             |                                                                   |                    |
| < 51 years [N=55]    | 40.3   11.2               | 44.4   10.7 | 21.7   60.0      | 23.5   65.6 | 29.9   40.2   50.8                                                | 36.6   46.2   51.3 |
| 51-60 years [N=118]  | <b>38.2</b>   9.8         | 45.3   10.2 | 18.8   60.5      | 21.1   64.5 | 30.8   35.2   44.9                                                | 36.8   46.6   54.0 |
| 61-70 years [N=83]   | <b>37.6</b>   9.3         | 47.7   9.0  | 19.0   58.2      | 25.5   64.0 | 30.2   38.0   46.6                                                | 41.7   48.0   54.9 |
| > 70 years [N=58]    | <b>36.7</b>   10.5        | 48.1   9.0  | 20.5   60.3      | 24.7   63.7 | 27.9   36.6   43.8                                                | 43.4   48.7   54.0 |

**14. Portugal:** Physical Component Summary (PCS) and Mental Component Summary (MCS) measure grouped by diagnosis, gender and age (cells with bold scores indicate >1 standard deviation below the standardized mean of 50)

|                      | Mean   Standard deviation |             | Min   Max scores |             | 25 <sup>th</sup>   50 <sup>th</sup>   75 <sup>th</sup> percentile |                    |
|----------------------|---------------------------|-------------|------------------|-------------|-------------------------------------------------------------------|--------------------|
| Portugal [N=277]     | PCS                       | MCS         | PCS              | MCS         | PCS                                                               | MCS                |
| <b>Diagnosis</b>     |                           |             |                  |             |                                                                   |                    |
| Angina [N=91]        | <b>39.3</b>   7.7         | 45.0   10.9 | 20.9   55.6      | 21.8   63.7 | 33.6   38.8   45.3                                                | 37.7   45.2   55.4 |
| MI [N=107]           | 43.5   8.7                | 44.9   11.0 | 25.6   61.7      | 21.3   65.2 | 37.1   44.2   51.4                                                | 36.7   44.9   54.5 |
| Heart failure [N=79] | <b>36.7</b>   8.6         | 45.6   11.2 | 19.5   57.2      | 17.4   63.8 | 29.0   36.0   41.9                                                | 37.9   46.5   54.2 |
| <b>Gender</b>        |                           |             |                  |             |                                                                   |                    |
| Female [N=63]        | <b>36.0</b>   8.4         | 41.2   10.5 | 19.5   54.2      | 21.3   63.8 | 28.8   35.2   43.0                                                | 32.3   41.6   49.6 |
| Male [N=214]         | 41.4   8.5                | 46.3   10.9 | 20.9   61.7      | 17.4   65.2 | 34.9   40.7   48.4                                                | 39.1   46.6   56.0 |
| <b>Age</b>           |                           |             |                  |             |                                                                   |                    |
| < 51 years [N=50]    | <b>39.6</b>   10.1        | 44.5   11.0 | 22.6   55.3      | 21.3   63.8 | 30.9   40.0   49.0                                                | 37.5   43.4   53.5 |
| 51-60 years [N=90]   | 40.6   8.0                | 43.8   10.9 | 25.6   61.7      | 17.4   64.5 | 34.5   39.7   46.5                                                | 36.3   43.9   52.5 |
| 61-70 years [N=80]   | 42.3   9.0                | 46.6   10.5 | 19.5   60.8      | 25.4   63.5 | 35.3   41.5   49.3                                                | 39.4   48.7   55.8 |
| > 70 years [N=57]    | <b>37.3</b>   7.8         | 45.6   11.9 | 20.9   54.2      | 21.8   65.2 | 32.5   37.2   42.6                                                | 38.4   46.5   55.6 |

**15. Russia:** Physical Component Summary (PCS) and Mental Component Summary (MCS) measure grouped by diagnosis, gender and age (cells with bold scores indicate >1 standard deviation below the standardized mean of 50)

|                      | Mean   Standard deviation |             | Min   Max scores |             | 25 <sup>th</sup>   50 <sup>th</sup>   75 <sup>th</sup> percentile |                    |
|----------------------|---------------------------|-------------|------------------|-------------|-------------------------------------------------------------------|--------------------|
| Russia [N=304]       | PCS                       | MCS         | PCS              | MCS         | PCS                                                               | MCS                |
| <b>Diagnosis</b>     |                           |             |                  |             |                                                                   |                    |
| Angina [N=106]       | <b>34.5</b>   7.3         | 43.8   9.2  | 18.3   52.3      | 24.2   60.7 | 29.0   32.6   39.2                                                | 36.8   44.2   50.5 |
| MI [N=100]           | <b>36.1</b>   6.6         | 43.2   9.9  | 22.6   59.3      | 23.7   60.4 | 31.2   35.6   39.6                                                | 33.7   43.7   52.4 |
| Heart failure [N=98] | <b>31.8</b>   6.1         | 42.8   9.9  | 22.9   51.4      | 20.6   63.2 | 27.8   30.2   35.7                                                | 35.9   42.0   48.9 |
| <b>Gender</b>        |                           |             |                  |             |                                                                   |                    |
| Female [N=84]        | <b>31.6</b>   6.2         | 40.1   8.5  | 18.3   52.3      | 20.6   58.9 | 28.5   30.3   34.2                                                | 34.8   39.2   46.4 |
| Male [N=220]         | <b>35.1</b>   6.9         | 44.5   9.8  | 22.9   59.3      | 23.8   63.2 | 29.5   34.9   39.2                                                | 36.5   44.8   52.2 |
| <b>Age</b>           |                           |             |                  |             |                                                                   |                    |
| < 51 years [N=66]    | <b>37.2</b>   7.4         | 45.5   10.1 | 24.6   59.3      | 24.2   62.5 | 29.9   37.7   41.4                                                | 35.9   46.9   55.4 |
| 51-60 years [N=105]  | <b>34.2</b>   6.3         | 42.4   9.1  | 24.1   51.4      | 24.2   63.2 | 29.1   33.0   37.3                                                | 35.5   41.1   49.0 |
| 61-70 years [N=100]  | <b>33.2</b>   6.9         | 43.6   9.3  | 18.3   52.3      | 23.7   62.7 | 28.9   32.4   37.5                                                | 37.0   44.5   50.4 |
| > 70 years [N=33]    | <b>30.7</b>   5.2         | 40.6   10.0 | 23.5   47.4      | 20.6   61.1 | 28.0   30.1   32.2                                                | 34.0   36.3   49.8 |

**16. Spain:** Physical Component Summary (PCS) and Mental Component Summary (MCS) measure grouped by diagnosis, gender and age (cells with bold scores indicate >1 standard deviation below the standardized mean of 50)

|                      | Mean   Standard deviation |             | Min   Max scores |             | 25 <sup>th</sup>   50 <sup>th</sup>   75 <sup>th</sup> percentile |                    |
|----------------------|---------------------------|-------------|------------------|-------------|-------------------------------------------------------------------|--------------------|
| Spain [N=258]        | PCS                       | MCS         | PCS              | MCS         | PCS                                                               | MCS                |
| <b>Diagnosis</b>     |                           |             |                  |             |                                                                   |                    |
| Angina [N=86]        | <b>37.4</b>   9.7         | 51.0   9.8  | 16.3   56.7      | 20.1   64.7 | 29.6   37.6   45.8                                                | 46.1   53.4   58.1 |
| MI [N=105]           | 45.3   8.3                | 52.4   9.6  | 27.6   60.3      | 26.1   65.8 | 38.6   45.7   52.7                                                | 47.1   55.3   60.2 |
| Heart failure [N=67] | <b>37.7</b>   10.2        | 52.4   9.2  | 10.3   56.4      | 29.1   66.7 | 31.1   35.6   46.0                                                | 46.8   53.3   59.4 |
| <b>Gender</b>        |                           |             |                  |             |                                                                   |                    |
| Female [N=34]        | <b>35.6</b>   8.7         | 49.7   8.5  | 16.3   53.4      | 21.2   61.4 | 30.6   35.2   39.6                                                | 46.2   51.3   56.4 |
| Male [N=224]         | 41.4   10.0               | 52.2   9.6  | 10.3   60.3      | 20.1   66.7 | 34.0   42.6   49.1                                                | 46.4   54.8   59.6 |
| <b>Age</b>           |                           |             |                  |             |                                                                   |                    |
| < 51 years [N=67]    | 45.2   9.0                | 53.1   8.6  | 24.4   58.9      | 20.1   65.8 | 38.6   45.5   53.1                                                | 48.5   54.7   59.5 |
| 51-60 years [N=65]   | 40.2   9.2                | 51.3   10.2 | 23.0   60.3      | 26.4   64.2 | 32.4   40.3   47.4                                                | 44.7   55.7   59.1 |
| 61-70 years [N=71]   | <b>39.2</b>   9.8         | 50.8   10.0 | 11.5   56.7      | 21.2   66.3 | 35.0   39.5   46.9                                                | 45.3   53.6   58.1 |
| > 70 years [N=55]    | <b>37.4</b>   10.7        | 52.6   9.2  | 10.3   56.6      | 29.1   66.7 | 30.1   35.0   46.3                                                | 46.4   53.3   60.6 |



**17. Sweden:** Physical Component Summary (PCS) and Mental Component Summary (MCS) measure grouped by diagnosis, gender and age (cells with bold scores indicate >1 standard deviation below the standardized mean of 50)

|                      | Mean   Standard deviation |             | Min   Max scores |             | 25 <sup>th</sup>   50 <sup>th</sup>   75 <sup>th</sup> percentile |                    |
|----------------------|---------------------------|-------------|------------------|-------------|-------------------------------------------------------------------|--------------------|
| Sweden [N=285]       | PCS                       | MCS         | PCS              | MCS         | PCS                                                               | MCS                |
| <b>Diagnosis</b>     |                           |             |                  |             |                                                                   |                    |
| Angina [N=89]        | 40.2   9.3                | 49.9   11.1 | 20.4   57.3      | 26.3   70.5 | 32.7   38.8   47.9                                                | 41.1   51.7   59.3 |
| MI [N=111]           | 44.1   9.1                | 47.9   10.1 | 12.6   60.2      | 24.2   62.7 | 39.4   44.4   51.0                                                | 38.8   50.5   56.3 |
| Heart failure [N=85] | <b>37.3</b>   10.4        | 49.5   9.7  | 19.5   55.2      | 27.1   66.0 | 28.5   34.2   47.3                                                | 43.8   49.7   57.7 |
| <b>Gender</b>        |                           |             |                  |             |                                                                   |                    |
| Female [N=71]        | <b>38.6</b>   10.0        | 46.4   11.0 | 15.8   60.2      | 24.2   66.0 | 30.0   40.0   45.3                                                | 36.8   49.3   56.3 |
| Male [N=214]         | 41.6   9.8                | 49.8   9.9  | 12.6   59.9      | 26.3   70.5 | 34.3   41.4   49.9                                                | 43.4   50.8   58.6 |
| <b>Age</b>           |                           |             |                  |             |                                                                   |                    |
| < 51 years [N=18]    | 46.6   7.7                | 45.2   10.4 | 32.8   57.3      | 26.3   62.7 | 39.2   48.2   53.9                                                | 35.2   46.2   53.0 |
| 51-60 years [N=58]   | 41.0   9.0                | 46.8   10.6 | 15.8   59.0      | 26.5   65.1 | 34.5   41.2   48.0                                                | 36.7   46.3   55.9 |
| 61-70 years [N=91]   | 41.0   10.5               | 50.1   9.7  | 19.6   57.1      | 28.3   68.6 | 32.7   41.1   50.8                                                | 41.7   52.3   57.9 |
| > 70 years [N=118]   | <b>39.8</b>   10.0        | 49.7   10.4 | 12.6   60.2      | 24.2   70.5 | 32.2   39.8   48.8                                                | 42.2   50.1   59.5 |

**18. Ukraine:** Physical Component Summary (PCS) and Mental Component Summary (MCS) measure grouped by diagnosis, gender and age (cells with bold scores indicate >1 standard deviation below the standardized mean of 50)

|                      | Mean   Standard deviation |            | Min   Max scores |             | 25 <sup>th</sup>   50 <sup>th</sup>   75 <sup>th</sup> percentile |                    |
|----------------------|---------------------------|------------|------------------|-------------|-------------------------------------------------------------------|--------------------|
| Ukraine [N=279]      | PCS                       | MCS        | PCS              | MCS         | PCS                                                               | MCS                |
| <b>Diagnosis</b>     |                           |            |                  |             |                                                                   |                    |
| Angina [N=94]        | <b>35.3</b>   7.6         | 43.8   9.5 | 18.2   56.9      | 21.7   62.5 | 29.7   34.5   40.2                                                | 36.4   43.3   51.2 |
| MI [N=97]            | <b>36.7</b>   7.5         | 44.9   7.2 | 23.2   61.4      | 29.9   61.7 | 30.9   35.1   42.9                                                | 39.0   45.1   50.3 |
| Heart failure [N=88] | <b>34.7</b>   7.8         | 42.6   8.6 | 21.8   50.5      | 17.6   63.9 | 28.4   33.4   42.0                                                | 36.7   40.6   49.7 |
| <b>Gender</b>        |                           |            |                  |             |                                                                   |                    |
| Female [N=87]        | <b>34.1</b>   8.0         | 42.1   8.8 | 18.2   61.4      | 17.6   62.1 | 27.5   32.6   38.7                                                | 35.3   42.8   49.1 |
| Male [N=192]         | <b>36.3</b>   7.4         | 44.5   8.3 | 21.7   56.9      | 25.5   63.9 | 30.5   34.9   42.7                                                | 38.2   44.4   51.4 |
| <b>Age</b>           |                           |            |                  |             |                                                                   |                    |
| < 51 years [N=55]    | <b>37.8</b>   8.9         | 44.1   9.0 | 18.2   61.4      | 21.7   59.0 | 31.2   36.6   44.8                                                | 36.5   44.1   51.9 |
| 51-60 years [N=117]  | <b>35.8</b>   6.9         | 42.9   8.0 | 21.7   52.1      | 17.6   62.5 | 30.9   35.1   41.2                                                | 37.8   42.7   49.0 |
| 61-70 years [N=82]   | <b>34.6</b>   7.6         | 44.7   8.9 | 21.8   53.2      | 25.5   63.9 | 28.6   33.0   41.5                                                | 37.1   45.6   51.4 |
| > 70 years [N=25]    | <b>33.2</b>   7.1         | 44.2   8.5 | 22.5   45.8      | 31.9   59.6 | 27.0   33.4   38.0                                                | 37.7   41.6   51.3 |

**19. USA:** Physical Component Summary (PCS) and Mental Component Summary (MCS) measure grouped by diagnosis, gender and age (cells with bold scores indicate >1 standard deviation below the standardized mean of 50)

|                       | Mean   Standard deviation |             | Min   Max scores |             | 25 <sup>th</sup>   50 <sup>th</sup>   75 <sup>th</sup> percentile |                    |
|-----------------------|---------------------------|-------------|------------------|-------------|-------------------------------------------------------------------|--------------------|
| USA [N=417]           | PCS                       | MCS         | PCS              | MCS         | PCS                                                               | MCS                |
| <b>Diagnosis</b>      |                           |             |                  |             |                                                                   |                    |
| Angina [N=198]        | <b>38.7</b>   10.9        | 49.1   10.4 | 14.9   60.9      | 19.6   69.8 | 29.9   37.6   47.9                                                | 41.9   51.0   57.8 |
| MI [N=109]            | 43.4   10.2               | 49.5   9.3  | 18.4   61.6      | 27.7   71.9 | 35.2   43.7   51.5                                                | 42.8   51.0   56.7 |
| Heart failure [N=110] | <b>36.0</b>   9.3         | 49.4   11.2 | 17.2   57.5      | 25.4   73.7 | 28.2   33.7   43.6                                                | 40.0   50.4   59.3 |
| <b>Gender</b>         |                           |             |                  |             |                                                                   |                    |
| Female [N=153]        | <b>37.2</b>   11.1        | 50.9   10.3 | 14.9   60.9      | 19.6   73.7 | 28.7   36.2   45.6                                                | 44.6   51.4   59.1 |
| Male [N=264]          | 40.3   10.2               | 48.4   10.3 | 19.8   61.6      | 23.0   71.9 | 31.8   40.4   48.8                                                | 39.9   50.1   57.3 |
| <b>Age</b>            |                           |             |                  |             |                                                                   |                    |
| < 51 years [N=33]     | 40.5   10.6               | 44.5   11.1 | 18.4   60.9      | 19.6   61.5 | 33.6   39.5   49.2                                                | 35.0   45.4   55.4 |
| 51-60 years [N=100]   | 40.2   11.7               | 45.6   10.5 | 14.9   61.6      | 23.0   65.8 | 30.0   40.5   50.5                                                | 37.3   45.3   54.1 |
| 61-70 years [N=110]   | 40.4   10.5               | 51.6   10.0 | 16.7   59.3      | 25.4   71.9 | 31.7   41.1   49.5                                                | 45.7   53.9   59.1 |
| > 70 years [N=174]    | <b>37.6</b>   9.9         | 50.9   9.5  | 17.2   57.9      | 29.0   73.7 | 29.7   37.1   44.9                                                | 43.3   51.9   58.9 |
